# Supplementary material for: Comparative Insights into Four Major Legume Sprouts Efficacies for Diabetes Management and Its Complications: Untargeted versus Targeted NMR Biochemometrics Approach
Source: MDPI journal article supplement (doi:10.3390/metabo13010063), 2022-12-31
Supplement: s1 [file s1]

## Supplementary Tables

**Table S1:** <sup>1</sup>H-NMR quantification of major primary and secondary metabolites in different samples of legume sprouts methanol extracts. Values are expressed as µg/mg dry powder ± S.D (n=3). Chemical shifts used for metabolite quantification were determined in methanol-*d*<sub>6</sub> and expressed as relative values to HMDS (0.94 mM final concentration) Statistical analysis is carried out by one-way analysis of variance (ANOVA) where unshared letters between groups are the significance value at *p*<0.05.

| ID | Compound            | Amount µg/mg dry matter    |                            |                            |                             |
|----|---------------------|----------------------------|----------------------------|----------------------------|-----------------------------|
|    |                     | Chickpea                   | Lentil                     | Fenugreek                  | Faba bean                   |
| 1  | ω-6 Fatty acid      | 51.19 ± 4.58 <sup>a</sup>  | 41.32 ± 4.26 <sup>bc</sup> | 38.16 ± 1.78 <sup>c</sup>  | 47.77 ± 4.12 <sup>ab</sup>  |
| 2  | ω-3 Fatty acid      | 20.12 ± 1.76 <sup>a</sup>  | 11.96 ± 0.85 <sup>b</sup>  | 21.69 ± 0.49 <sup>a</sup>  | 13.00 ± 1.30 <sup>b</sup>   |
| 3  | Sucrose             | 239.82 ± 6.98 <sup>a</sup> | 144.67 ± 5.87 <sup>c</sup> | 178.74 ± 3.39 <sup>b</sup> | 172.96 ± 7.80 <sup>b</sup>  |
| 4  | Fructose            | 148.39 ± 3.67 <sup>a</sup> | 82.91 ± 2.50 <sup>d</sup>  | 103.72 ± 1.55 <sup>b</sup> | 95.60 ± 3.81 <sup>c</sup>   |
| 5  | α-Glucose           | 36.89 ± 5.11 <sup>c</sup>  | 73.43 ± 5.28 <sup>b</sup>  | 94.92 ± 1.76 <sup>a</sup>  | 71.06 ± 7.58 <sup>b</sup>   |
| 6  | β-Glucose           | 43.15 ± 3.33 <sup>c</sup>  | 76.31 ± 5.11 <sup>b</sup>  | 89.00 ± 7.70 <sup>a</sup>  | 81.72 ± 4.15 <sup>ab</sup>  |
| 7  | Alanine             | 31.46 ± 1.88 <sup>b</sup>  | 23.51 ± 2.51 <sup>c</sup>  | 44.59 ± 1.88 <sup>a</sup>  | 25.01 ± 1.19 <sup>c</sup>   |
| 8  | Valine              | 12.61 ± 0.63 <sup>b</sup>  | 14.59 ± 0.95 <sup>a</sup>  | 12.57 ± 0.75 <sup>b</sup>  | 10.26 ± 0.83 <sup>c</sup>   |
| 10 | 4-Hydroxyisoleucine | 0.0 ± 0.0 <sup>b</sup>     | 0.0 ± 0.0 <sup>b</sup>     | 51.13 ± 3.53 <sup>a</sup>  | 0.0 ± 0.0 <sup>b</sup>      |
| 11 | Asparagine          | 61.05 ± 4.51 <sup>b</sup>  | 73.46 ± 8.09 <sup>b</sup>  | 93.43 ± 4.29 <sup>a</sup>  | 72.71 ± 9.68 <sup>b</sup>   |
| 12 | Choline             | 19.06 ± 0.54 <sup>a</sup>  | 16.91 ± 1.09 <sup>b</sup>  | 9.06 ± 0.20 <sup>c</sup>   | 9.94 ± 0.95 <sup>c</sup>    |
| 13 | Betaine             | 12.98 ± 0.62 <sup>b</sup>  | 10.06 ± 0.87 <sup>bc</sup> | 5.06 ± 1.10 <sup>c</sup>   | 109.16 ± 5.49 <sup>a</sup>  |
| 15 | Phenylalanine       | 0.0 ± 0.0 <sup>b</sup>     | 8.61 ± 0.62 <sup>a</sup>   | 8.69 ± 0.94 <sup>a</sup>   | 9.07 ± 1.45 <sup>a</sup>    |
| 16 | Tyrosine            | 0.0 ± 0.0 <sup>c</sup>     | 8.59 ± 0.53 <sup>b</sup>   | 8.93 ± 0.68 <sup>b</sup>   | 15.57 ± 2.69 <sup>a</sup>   |
| 17 | L-Dopa              | 0.0 ± 0.0 <sup>b</sup>     | 0.0 ± 0.0 <sup>b</sup>     | 0.0 ± 0.0 <sup>b</sup>     | 112.40 ± 13.16 <sup>a</sup> |
| 18 | Tryptophan          | 24.16 ± 5.02 <sup>a</sup>  | 22.82 ± 3.70 <sup>a</sup>  | 22.05 ± 2.32 <sup>a</sup>  | 10.36 ± 2.99 <sup>b</sup>   |
| 19 | Histidine           | 4.23 ± 0.25 <sup>c</sup>   | 11.22 ± 1.77 <sup>a</sup>  | 7.43 ± 1.91 <sup>b</sup>   | 11.07 ± 1.77 <sup>a</sup>   |
| 20 | Cytosine            | 9.39 ± 1.95 <sup>a</sup>   | 6.16 ± 1.30 <sup>b</sup>   | 5.53 ± 0.72 <sup>b</sup>   | 7.30 ± 1.45 <sup>ab</sup>   |
| 22 | Acetic acid         | 0.0 ± 0.0 <sup>b</sup>     | 10.51 ± 0.46 <sup>a</sup>  | 0.0 ± 0.0 <sup>b</sup>     | 0.0 ± 0.0 <sup>b</sup>      |
| 23 | Fumaric acid        | 2.18 ± 0.19 <sup>c</sup>   | 2.51 ± 0.25 <sup>bc</sup>  | 3.11 ± 0.16 <sup>a</sup>   | 2.84 ± 0.34 <sup>ab</sup>   |
| 24 | β-Sitosterol        | 8.95 ± 0.67 <sup>b</sup>   | 10.12 ± 0.78 <sup>ab</sup> | 8.56 ± 1.03 <sup>b</sup>   | 10.77 ± 0.90 <sup>a</sup>   |
| 25 | Trigonelline        | 18.03 ± 0.97 <sup>b</sup>  | 8.11 ± 1.02 <sup>d</sup>   | 24.73 ± 1.02 <sup>a</sup>  | 11.59 ± 1.34 <sup>c</sup>   |
| 26 | Biochanin A         | 32.04 ± 2.12 <sup>a</sup>  | 0.0 ± 0.0 <sup>b</sup>     | 0.0 ± 0.0 <sup>b</sup>     | 0.0 ± 0.0 <sup>b</sup>      |
| 27 | Genistin            | 43.86 ± 4.87 <sup>a</sup>  | 0.0 ± 0.0 <sup>b</sup>     | 0.0 ± 0.0 <sup>b</sup>     | 0.0 ± 0.0 <sup>b</sup>      |
| 28 | Malonyl-genistin    | 78.88 ± 1.46 <sup>a</sup>  | 0.0 ± 0.0 <sup>b</sup>     | 0.0 ± 0.0 <sup>b</sup>     | 0.0 ± 0.0 <sup>b</sup>      |
| 29 | Formononetin        | 35.52 ± 2.00 <sup>a</sup>  | 0.0 ± 0.0 <sup>b</sup>     | 0.0 ± 0.0 <sup>b</sup>     | 0.0 ± 0.0 <sup>b</sup>      |
| 30 | Daidzin             | 49.27 ± 3.10 <sup>a</sup>  | 0.0 ± 0.0 <sup>b</sup>     | 0.0 ± 0.0 <sup>b</sup>     | 0.0 ± 0.0 <sup>b</sup>      |
| 31 | Malonyl-daidzin     | 80.22 ± 3.56 <sup>a</sup>  | 0.0 ± 0.0 <sup>b</sup>     | 0.0 ± 0.0 <sup>b</sup>     | 0.0 ± 0.0 <sup>b</sup>      |
| 32 | Cicerin             | 33.19 ± 2.84 <sup>a</sup>  | 0.0 ± 0.0 <sup>b</sup>     | 0.0 ± 0.0 <sup>b</sup>     | 0.0 ± 0.0 <sup>b</sup>      |

**Table S2:** Summarized regression coefficient ( $R^2$ ) values calculated for major legume sprout metabolites against investigated parameters.

| Major metabolites       | Blood glucose | GSH  | MDA  | ALT  | AST  | ALP  | SOD  | Cholesterol | LDL  | HDL  | TG   |
|-------------------------|---------------|------|------|------|------|------|------|-------------|------|------|------|
| Total flavonoid content | 0.85          | 0.72 | 0.35 | 0.3  | 0.37 | 0.99 | 0.52 | 0.41        | 0.77 | 0.0  | 0.26 |
| Choline                 | 0.22          | 0    | 0.38 | 0    | 0.27 | 0.4  | 0.03 | 0.02        | 0.16 | 0.55 | 0.05 |
| $\beta$ -Sitosterol     | 0.8           | 0.71 | 0.55 | 0.96 | 0.69 | 0.38 | 0.99 | 0           | 0.12 | 0.32 | 0.04 |
| Trigonelline            | 0.32          | 0.38 | 0.25 | 0.86 | 0.38 | 0.03 | 0.69 | 0.05        | 0    | 0.63 | 0    |
| $\omega$ 6-Fatty acid   | 0.04          | 0.43 | 0.17 | 0.02 | 0.09 | 0.09 | 0.04 | 0.6         | 0.37 | 0.5  | 0.92 |
| L-DOPA                  | 0.92          | 0.79 | 0.4  | 0.4  | 0.44 | 0.96 | 0.63 | 0.34        | 0.7  | 0.03 | 0.24 |
| Betaine                 | 0.91          | 0.84 | 0.37 | 0.42 | 0.41 | 0.94 | 0.65 | 0.36        | 0.71 | 0.06 | 0.28 |
| Histidine               | 0.54          | 0.16 | 0.92 | 0.75 | 0.96 | 0.17 | 0.7  | 0.16        | 0    | 0.01 | 0.15 |
| 4-Hydroxyisoleucine     | 0.16          | 0.52 | 0    | 0.44 | 0.03 | 0.02 | 0.38 | 0.05        | 0.04 | 0.97 | 0.29 |
| Alanine                 | 0.32          | 0.53 | 0.13 | 0.77 | 0.24 | 0.05 | 0.66 | 0           | 0.01 | 0.8  | 0.08 |
| Cytosine                | 0.01          | 0.17 | 0.42 | 0.01 | 0.31 | 0    | 0    | 0.48        | 0.19 | 0.41 | 0.8  |
| Asparagine              | 0.01          | 0.31 | 0.15 | 0.08 | 0.06 | 0    | 0.07 | 0.16        | 0.05 | 0.87 | 0.52 |

## Supplementary Figures

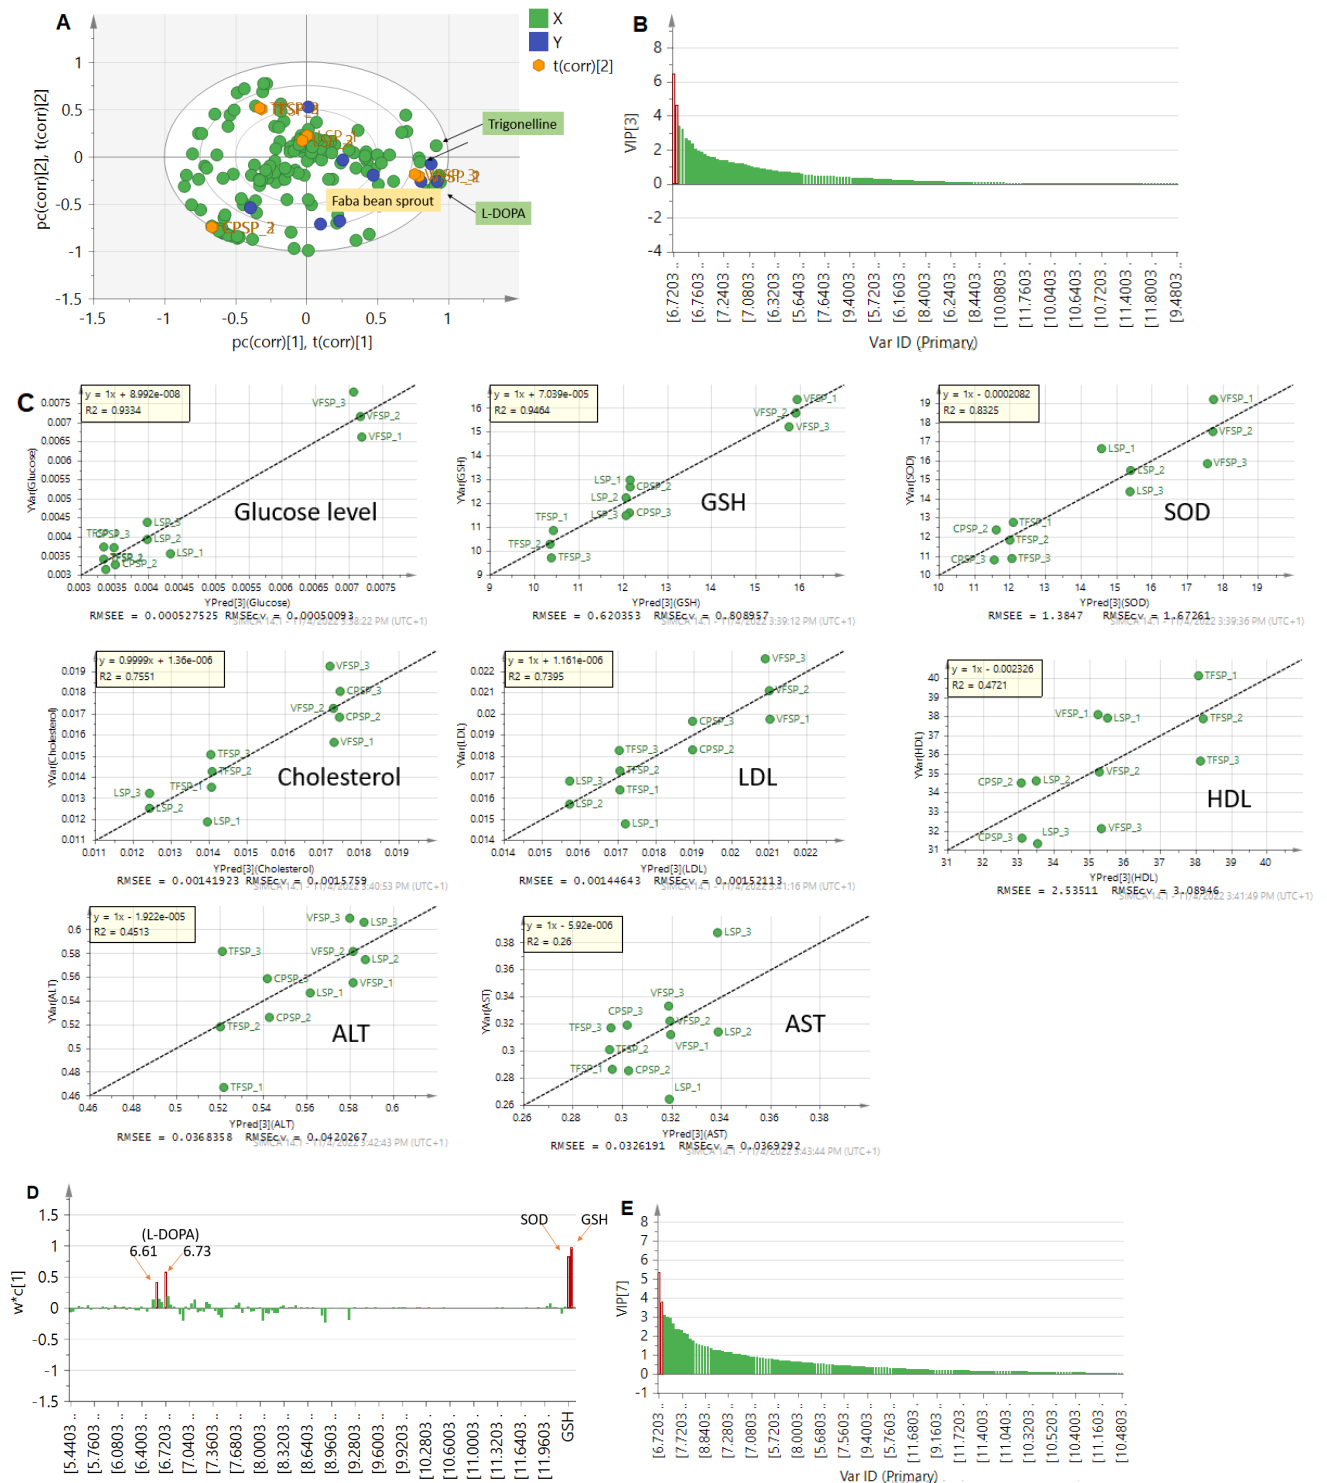

**Figure S1. A: Biplot, B: VIP score plot, and C: Observed versus predicted effect for GSH, SOD, and glucose level, showing correlation of antioxidant and glucose lowering effects in relation to binned metabolites by NMR in aromatic region ( $\delta_H$  5.5-11.0 ppm). D: Loading bar plot and E: VIP score after exclusion of glucose level.**

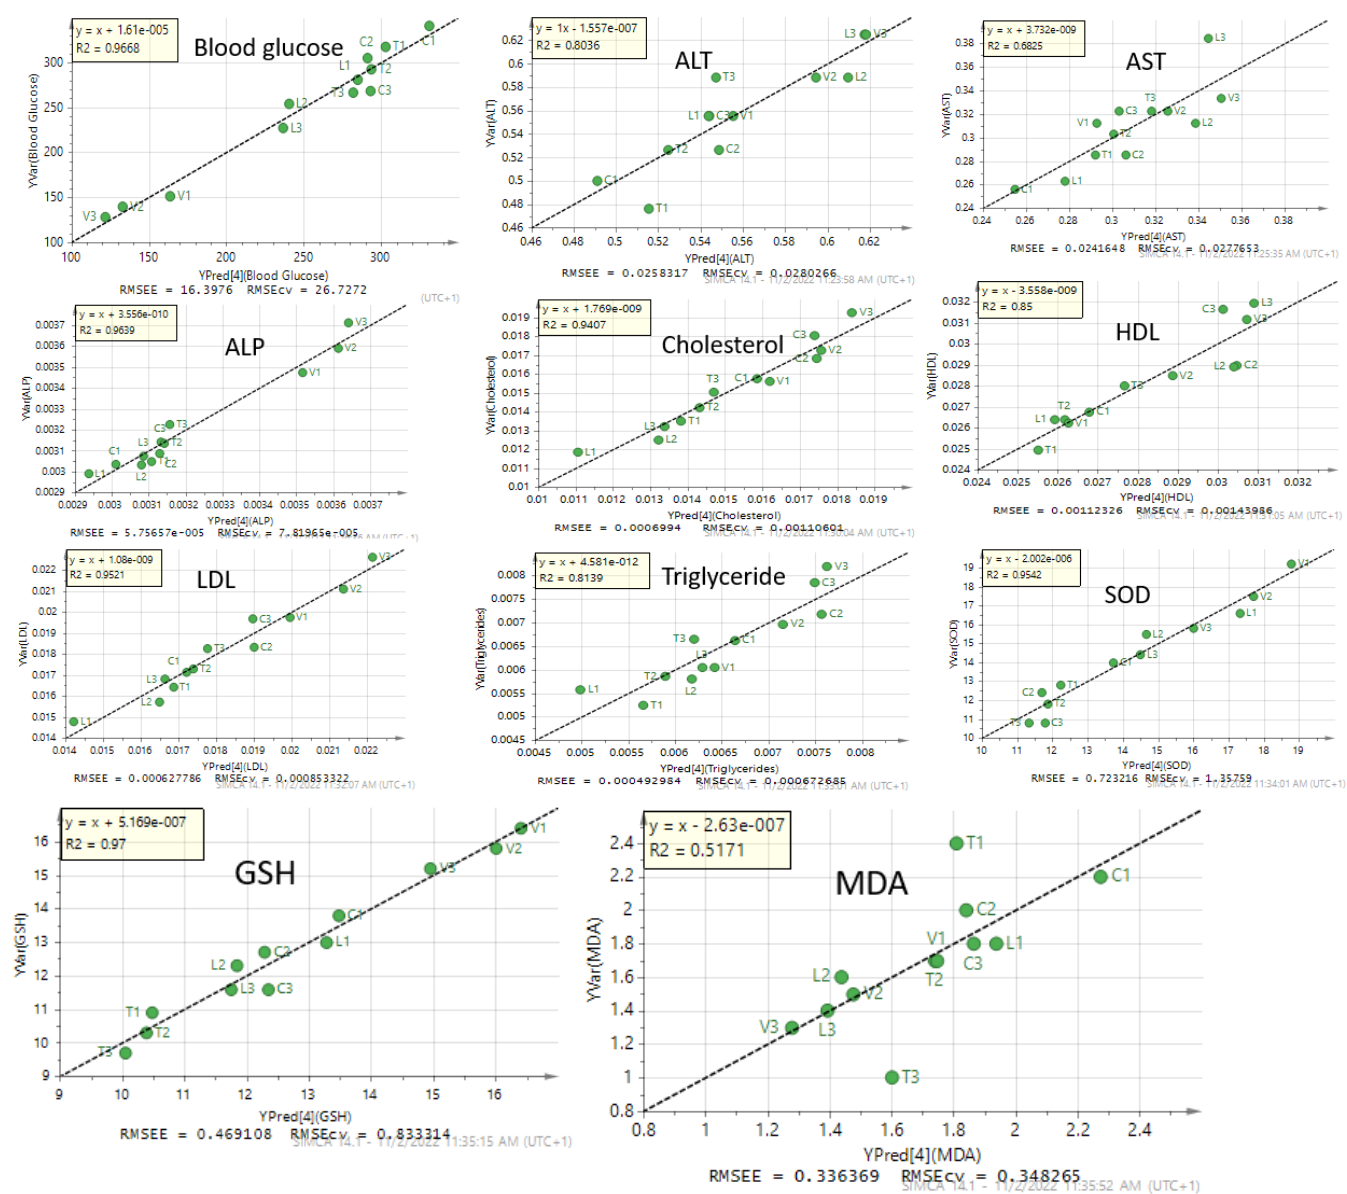

**Figure S2.** Y-observed versus Y-predicted plot showing the constructed model's goodness of fit based on metabolites quantified by NMR in legume sprouts against values of various biomarkers used for evaluation of antidiabetic effect.

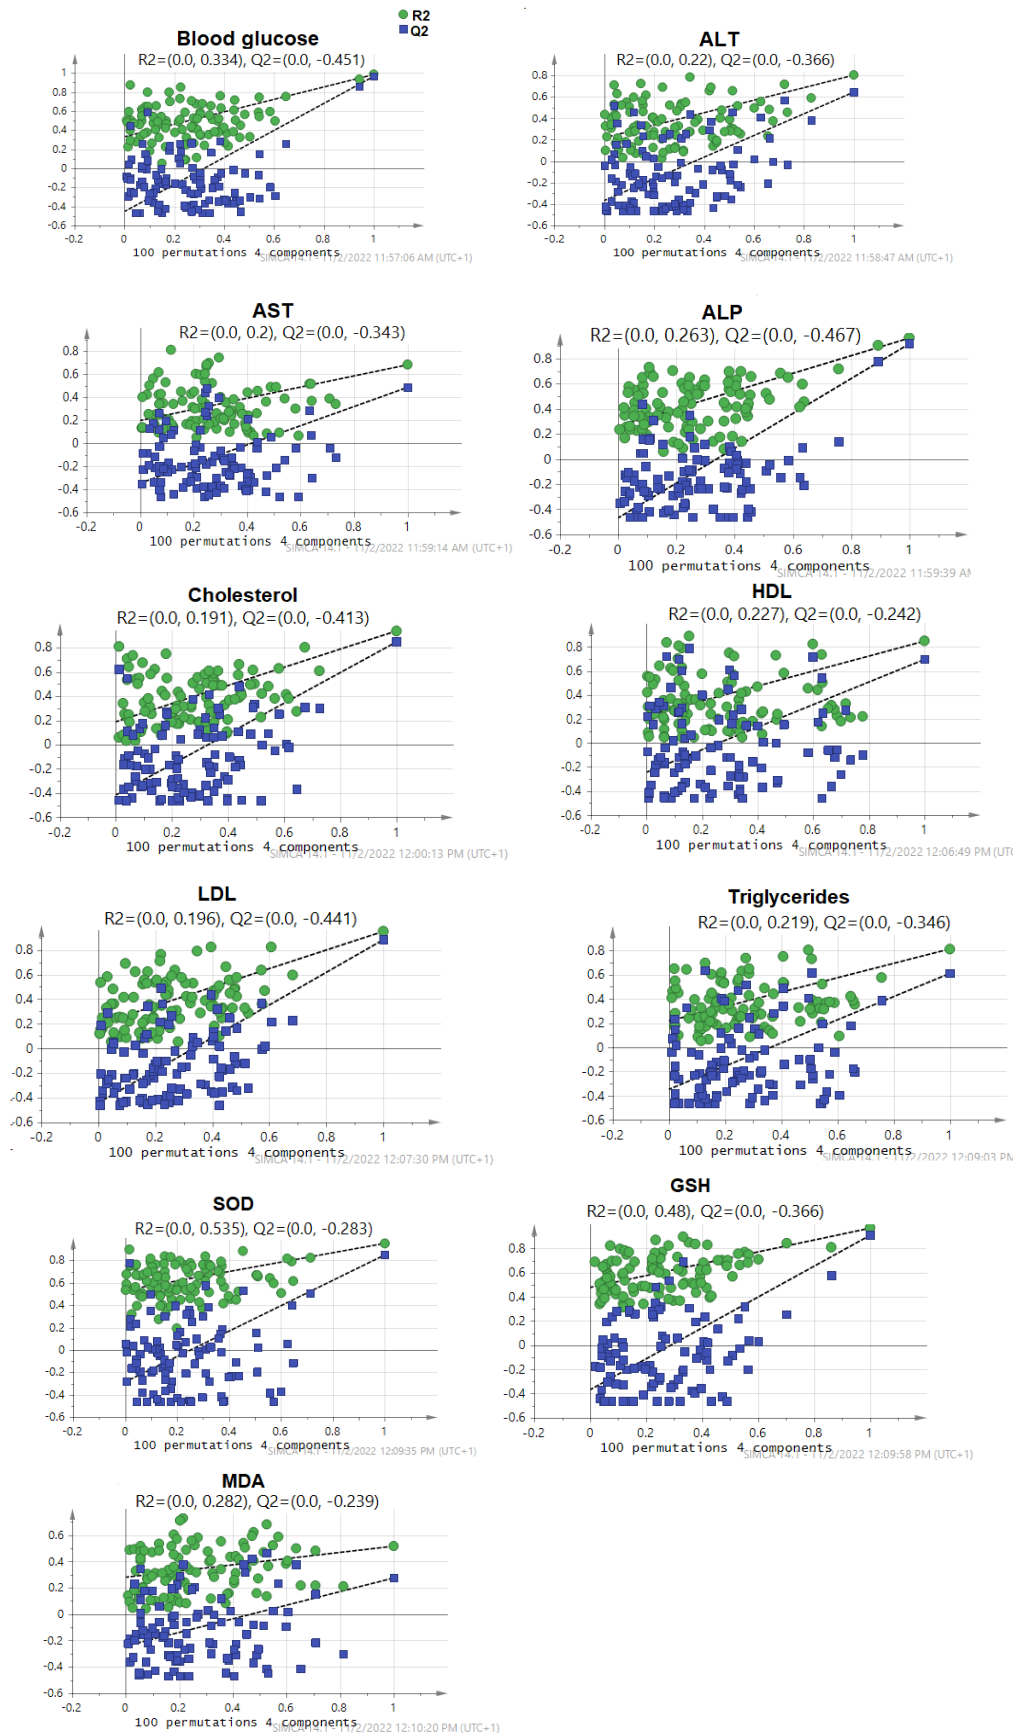

**Figure S3:** Permutation tests (n=100) of the various antidiabetic biomarkers modelled for phytochemicals identified by NMR in legume sprouts.
